# Supplementary material for: Genome-Wide Association Study Candidate Genes on Mammary System-Related Teat-Shape Conformation Traits in Chinese Holstein Cattle
Source: MDPI journal article supplement (doi:10.3390/genes12122020), 2021-12-19
Supplement: s1 [file s1]

## Supplementary Files

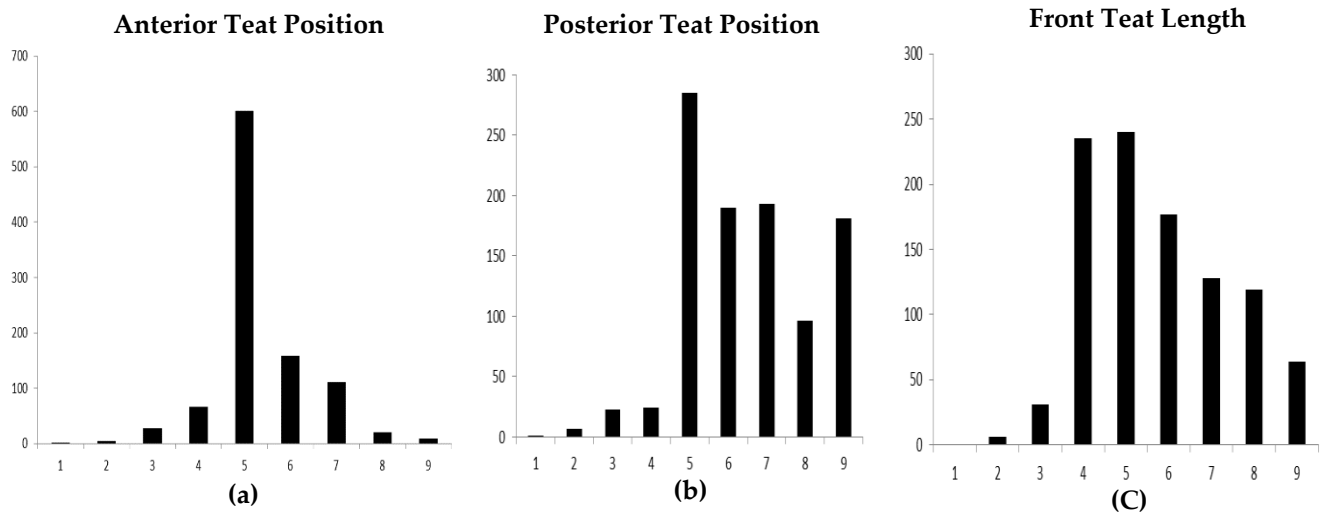

**Figure S1.** Distribution for Teat traits Condition Score (1-9) of the phenotypes of ATP (a), PTP (b) and FTL (c) of the Holstein Cattle.

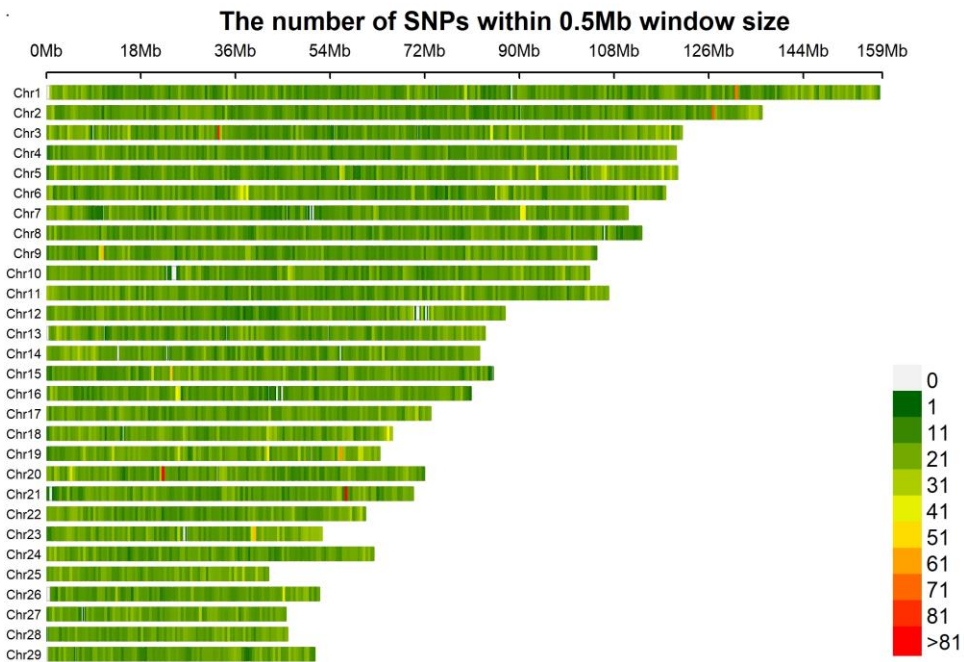

**Figure S2.** Distribution of SNPs is showed on 29 autosomes chromosomes in heatmap by MAF.

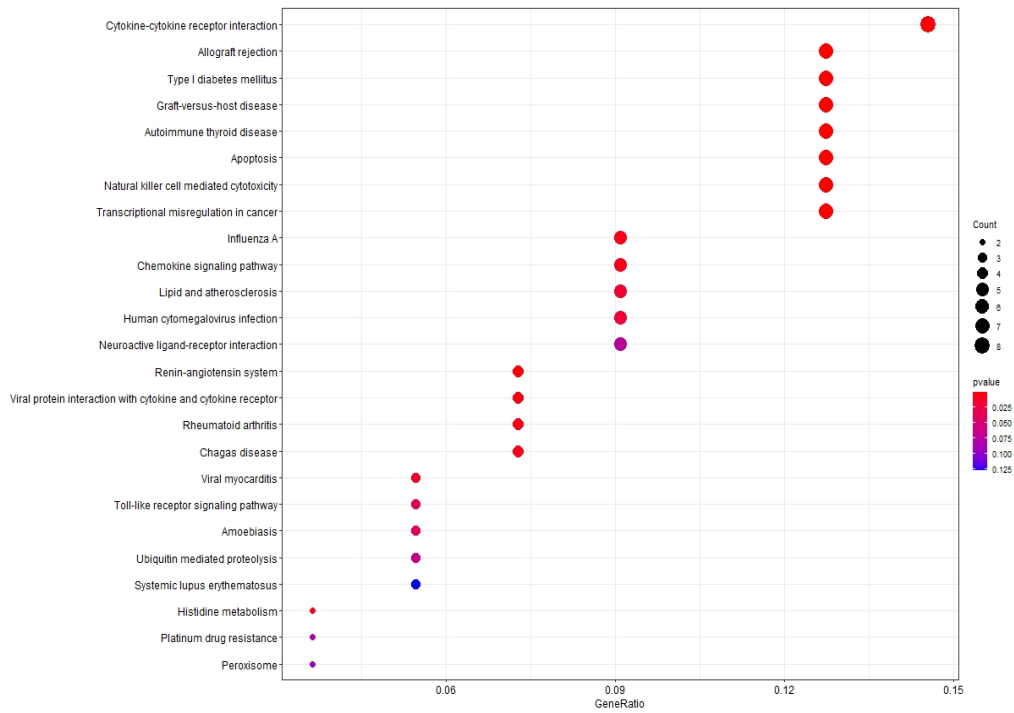

**Figure S3.** Kyoto encyclopedia of genes and genomes (KEGG) pathways analysis for the regional candidate gene with genome-wide association.

**Table S1.** Gene Ontology (GO) results

| Gene Ontology      | ID         | Description                                             | <i>p</i> value | Gene Name              | Counts |
|--------------------|------------|---------------------------------------------------------|----------------|------------------------|--------|
| Biological Process | GO:1901606 | alpha-amino acid catabolic process                      | 0.0013         | <i>GCAT/AMDHD1/HAL</i> | 3      |
|                    | GO:0009063 | cellular amino acid catabolic process                   | 0.0017         | <i>GCAT/AMDHD1/HAL</i> | 3      |
|                    | GO:0009072 | aromatic amino acid family metabolic process            | 0.0022         | <i>AMDHD1/HAL</i>      | 2      |
|                    | GO:0006536 | glutamate metabolic process                             | 0.0026         | <i>AMDHD1/HAL</i>      | 2      |
|                    | GO:0070936 | protein K48-linked ubiquitination                       | 0.0068         | <i>UBE2Q2/UBE2K</i>    | 2      |
|                    | GO:0016054 | organic acid catabolic process                          | 0.0072         | <i>GCAT/AMDHD1/HAL</i> | 3      |
|                    | GO:0046395 | carboxylic acid catabolic process                       | 0.0072         | <i>GCAT/AMDHD1/HAL</i> | 3      |
|                    | GO:0043648 | dicarboxylic acid metabolic process                     | 0.0081         | <i>AMDHD1/HAL</i>      | 2      |
|                    | GO:1901605 | alpha-amino acid metabolic process                      | 0.0088         | <i>GCAT/AMDHD1/HAL</i> | 3      |
|                    | GO:0000724 | double-strand break repair via homologous recombination | 0.0089         | <i>MMS22L/RAD51D</i>   | 2      |

|                    |            |                                                     |        |                                              |   |
|--------------------|------------|-----------------------------------------------------|--------|----------------------------------------------|---|
|                    | GO:0001701 | in utero embryonic development                      | 0.0091 | <i>E2F8/ADAM10/SMIM14</i>                    | 3 |
|                    | GO:0000725 | recombinational repair                              | 0.0096 | <i>MMS22L/RAD51D</i>                         | 2 |
|                    | GO:0009064 | glutamine family amino acid metabolic process       | 0.0128 | <i>AMDHD1/HAL</i>                            | 2 |
|                    | GO:0016999 | antibiotic metabolic process                        | 0.0128 | <i>AMDHD1/HAL</i>                            | 2 |
|                    | GO:0006261 | DNA-dependent DNA replication                       | 0.0145 | <i>MMS22L/E2F8</i>                           | 2 |
|                    | GO:0006520 | cellular amino acid metabolic process               | 0.0166 | <i>GCAT/AMDHD1/HAL</i>                       | 3 |
|                    | GO:0009790 | embryo development                                  | 0.0172 | <i>E2F8/ADAM10/UGDH/SMIM14</i>               | 4 |
|                    | GO:0019752 | carboxylic acid metabolic process                   | 0.0182 | <i>GCAT/AMDHD1/HAL/LTA4H/UGDH</i>            | 5 |
|                    | GO:0044282 | small molecule catabolic process                    | 0.0202 | <i>GCAT/AMDHD1/HAL</i>                       | 3 |
|                    | GO:0043436 | oxoacid metabolic process                           | 0.0214 | <i>GCAT/AMDHD1/HAL/LTA4H/UGDH</i>            | 5 |
|                    | GO:1901565 | organonitrogen compound catabolic process           | 0.0214 | <i>GCAT/AMDHD1/HAL/LTA4H/UBE2K</i>           | 5 |
|                    | GO:0006082 | organic acid metabolic process                      | 0.0233 | <i>GCAT/AMDHD1/HAL/LTA4H/UGDH</i>            | 5 |
|                    | GO:0043009 | chordate embryonic development                      | 0.0248 | <i>E2F8/ADAM10/SMIM14</i>                    | 3 |
|                    | GO:0006302 | double-strand break repair                          | 0.0331 | <i>MMS22L/RAD51D</i>                         | 2 |
|                    | GO:0000209 | protein polyubiquitination                          | 0.0344 | <i>UBE2Q2/UBE2K</i>                          | 2 |
|                    | GO:0043933 | protein-containing complex subunit organization     | 0.0384 | <i>MICAL3/SNRPF/LIPC/STXBP6/UBE2K/UGDH</i>   | 6 |
|                    | GO:0006310 | DNA recombination                                   | 0.0384 | <i>MMS22L/RAD51D</i>                         | 2 |
|                    | GO:0006260 | DNA replication                                     | 0.0468 | <i>MMS22L/E2F8</i>                           | 2 |
| Cell Component     | GO:0005657 | replication                                         | 0.0044 | <i>MMS22L/RAD51D</i>                         | 2 |
| Molecular Function | GO:0070011 | peptidase activity, acting on L-amino acid peptides | 0.0096 | <i>LTA4H/ADAM10/MINDY2/GZMB</i>              | 4 |
|                    | GO:0008233 | peptidase activity                                  | 0.0108 | <i>LTA4H/ADAM10/MINDY2/GZMB</i>              | 4 |
|                    | GO:0008237 | metallopeptidase activity                           | 0.0143 | <i>LTA4H/ADAM10</i>                          | 2 |
|                    | GO:0050662 | coenzyme binding                                    | 0.0272 | <i>MICAL3/GCAT/UGDH</i>                      | 3 |
|                    | GO:0008201 | heparin binding                                     | 0.029  | <i>LOC504773/LIPC</i>                        | 2 |
|                    | GO:0140096 | catalytic activity, acting on a protein             | 0.0386 | <i>LTA4H/ADAM10/MINDY2/UBE2Q2/UBE2K/GZMB</i> | 6 |
|                    | GO:0005539 | glycosaminoglycan binding                           | 0.0419 | <i>LOC504773/LIPC</i>                        | 2 |
